1 **Trends and predictors of unmet need for family planning**  
2 **among women living with HIV in Zambia: implications for**  
3 **elimination of Mother to Child Transmission of HIV**

4 **Authors**

5 Edgar Arnold Lungu<sup>1\*</sup>, Mwimba Chewe<sup>2</sup>

6 **Affiliations**

7 <sup>1</sup>Health and HIV Section, UNICEF Zambia, Alick Nkhata Rd, Long Acres

8 PO Box 33610, Lusaka, Zambia

9

10 <sup>2</sup>Department of Public Health, University of Zambia

11 Burma Road, PO Box: 50110,

12 Lusaka, Zambia

13 \*Corresponding author

14 Email: [edgar.lungu@gmail.com](mailto:edgar.lungu@gmail.com)

15

## 16 **Abstract**

### 17 **Introduction**

18 Prevention of Mother To Child Transmission (PMTCT) of HIV is one of the key strategies towards  
19 HIV epidemic control. Despite considerable progress in PMTCT of HIV over the past decade in  
20 Zambia, the country is yet to reach global and national target for elimination of Mother To Child  
21 Transmission of HIV. Avoidance of unintended pregnancy among women living with HIV provides  
22 is one of the cost-effective interventions in a comprehensive PMTCT of HIV approach. This study  
23 therefore aimed at ascertaining trends in and predictors of unmet need for family planning  
24 among women living with HIV in Zambia

### 25 **Methods**

26 The study employed a repeated cross sectional (RCS) study design, using data from the three (3)  
27 most recent consecutive rounds of the Zambia Demographic and Health Survey (ZDHS)  
28 conducted in 2007, 2013/2014 and 2018. The study used data from a total of 34,204 women aged  
29 15-49 years from the three survey points, 2007, 2013/14 and 2018, among whom 4,985 were HIV  
30 positive, with a final sample size constituting 2,675 married women living with HIV. We used  
31 descriptive statistics and logistic regression analyses to respectively ascertain trends in and  
32 predictors of unmet need for family planning among married women living with HIV.

### 33 **Results**

34 Over the three survey points, unmet need for family planning among married women living with  
35 HIV has hardly declined, registering 22% in both the 2007 and 2018. Residence, age of women,

36 household wealth, woman's parity, employment, and age of spouse emerged as significant  
37 predictors of unmet need for family planning among women living with HIV in Zambia

## 38 **Conclusion**

39 Preventing one HIV infection in a child is averting lifetime costs of HIV treatment and associated  
40 healthcare costs. There is need to consider optimization of PMTCT interventions including  
41 shaping programming regarding prong 2 in a way that it responds to main causes of mother to  
42 child transmission of HIV in Zambia. Among other aspects, policy and practice needs to  
43 strengthen SRH/HIV integration and better target rural residents, younger women, those with  
44 high parity and consider positive male engagement to reduce unmet need for family planning  
45 among women living with HIV.

## 46 **Introduction**

47 Prevention of mother-to-child transmission (PMTCT) of HIV has been integral to global HIV  
48 prevention interventions since the late 1990's following the success of the short-course  
49 Zidovudine and single-dose nevirapine clinical trials (1-3). Subsequent recommendation from  
50 the World Health Organisation on the use of ARV drugs for PMTCT first issued in 2000 (4) also  
51 provided prominence to PMTCT of HIV programming. In the context of programming for  
52 Millennium Development Goals (MDGs), a more comprehensive four-pronged approach to  
53 PMTCT of HIV was launched by the United Nations in 2003 (5) and adopted by many countries  
54 with high HIV burden. The four-pronged approach focuses on provision of cost-effective  
55 interventions at critical stages during the perinatal period to prevent mother to child  
56 transmission of HIV (see figure 1).

57 The first prong focusses on primary prevention of HIV among the general population, especially  
58 among women of reproductive age, given that averting new HIV infections in this population  
59 group entails parents that are free of HIV effectively eliminating the risk of transmission from  
60 parent to child. The second prong entails prevention of unwanted pregnancies among women  
61 living with HIV. Whilst more potent anti-retroviral (ARV) drugs currently exist and significantly  
62 reduce probability of mother to child transmission of HIV, avoidance of unintended pregnancy  
63 among women living with HIV provides a cost-effective way as it eliminates the risk of  
64 transmission. The third prong involves preventing mother-to-child transmission of HIV among  
65 pregnant and breastfeeding women who are living with HIV, and largely entails provision of HIV  
66 testing for case detection and linkage to sustained care and treatment especially provision of  
67 ARVs to reduce probability of mother to child transmission. The fourth prong requires provision  
68 of care, treatment and support services to women living with HIV, their children, and families  
69 with view to provide HIV prophylaxis for HIV exposed children, continued care and treatment for  
70 women to reduce new HIV infections in the breastfeeding period (5).

71

72 **Insert Figure 1: Four prongs for comprehensive prevention of mother to child transmission of**  
73 **HIV**

74 Although all four prongs are central to preventing mother to child transmission of HIV and  
75 promoting the health of women, PMTCT programmes in many countries have predominantly  
76 focused on identifying pregnant women with HIV and initiating them on treatment (prong 3) (6).  
77 Essentially, prong 3 and 4 interventions have been synonymous to PMTCT of HIV in many high

78 HIV burden countries. Evidence on effectiveness of Option B+ and Treatment as Prevention  
79 (TasP) have arguably shaped the programming context in PMTCT (7) to date.

80 From 2015, UNAIDS advocated for a quarter for prevention aimed at revitalizing HIV prevention  
81 by calling for investing a quarter of resources in HIV and AIDS response to HIV prevention  
82 interventions (8) (which would predominantly serve prong 1 for PMTCT of HIV) given that ‘we  
83 cannot treat ourselves out of the HIV epidemic’. Whereas in theory, this made investment sense,  
84 actual implementation still principally focused on care and treatment interventions (mostly  
85 prongs 3 and 4). Granted this programming context, it is probable that the success of PMTCT  
86 programmes such as averting more than 110,000 new HIV infections among children between  
87 2012 and 2021 in Zambia (9) and a 38 per cent reduction in MTCT of HIV between 2009 and 2014  
88 (10) has largely been due to increasing coverage of prong 3 and 4 interventions.

89 Despite the prominence of prongs 3 and 4 in PMTCT programmes of high HIV burden countries  
90 including Zambia, evidence exists suggesting the centrality of prong 2 (prevention of unintended  
91 pregnancies among women living with HIV). For example, a study in PEPFAR supported countries  
92 estimated that annual number of unintended HIV-positive births averted by contraceptive use  
93 ranged from 178 in Guyana to over 120,000 in South Africa with minimum annual cost savings to  
94 prevent unwanted HIV-positive births reaching over 2.2 million United States Dollars in South  
95 Africa (11). Furthermore, a mathematical modelling study based on data from Uganda predicted  
96 that the effect of preventing unintended pregnancies in HIV positive women could contribute to  
97 PMTCT equally or more than ART (12). Noticeably, much of this evidence was in the pre-Option  
98 B plus and universal ART eligibility programming era (i.e. where ART was only given to the mother  
99 for up to 6 weeks and later up to two years postpartum for purposes of PMTCT of HIV).

100 Whereas, more recent estimates, in the context of high ART coverage among pregnant women  
101 show lower numbers of infant HIV infections averted by contraception than previously estimated,  
102 overarching conclusion from studies remains that contraception plays a significant role in  
103 preventing new infant HIV infections (13). On this basis, investing in prong 2 has significant merit  
104 to HIV epidemic control in general and specifically the elimination of Mother To Child  
105 Transmission (eMTCT) of HIV agenda. Arguably, the optimal benefits of investing in prong 2 have  
106 not been reaped (13) largely due to programming context. Expanding family planning services for  
107 women living with HIV presents opportunities to substantially contribute towards eMTCT of HIV  
108 in high HIV burden countries such as Zambia.

109 Zambia adopted and developed plans to pursue the global agenda for eMTCT of HIV with two  
110 impact targets, namely; an MTCT rate of HIV of less than 5% in breastfeeding population; and a  
111 population case rate of new pediatric HIV infections due to MTCT of equal to or less than 50 cases  
112 per 100,000 live births, (14 – 15). Whilst significant progress has been made, these targets were  
113 not achieved by 2021. Indeed, Zambia has sustained high coverage of HIV testing for pregnant  
114 women attending antenatal care which currently stands at 95% and consequently a high Anti-  
115 Retroviral Therapy (ART) coverage among pregnant women, currently standing at 97% in 2021  
116 (9). Nonetheless, an MTCT of HIV rate at the end of exposure period (at the end of breast feeding)  
117 remains high at 8% falling short of the eMTCT of HIV targets. This reflects the need to re-examine  
118 current implementation including sustaining gains in prongs 3 and 4 while strengthening  
119 evidence and investment in prongs 1 and 2 which have hitherto been of relative low worth.  
120 Indeed, achieving the eMTCT agenda requires a comprehensive approach to PMTCT of HIV  
121 programming espousing optimal implementation of the four-pronged approach.

122 In the most recent Demographic and Health Survey (DHS) report, unmet need for family planning  
123 is estimated to be 19.7% in Zambia (16). There is paucity of consistent nationally representative  
124 data on unmet need for family planning among women living with HIV, with few studies reporting  
125 this statistic at a point in time (cross-sectional). In some cases, programme level data suggest an  
126 increasing uptake of family planning among women living with HIV in project’s lifespan (17).  
127 While there is some literature that has looked at unmet need for family planning among women  
128 in Zambia, there still remains a gap in literature on trends in unmet need for family planning  
129 amongst women living with HIV. Specifically, questions such as “Has the unmet need for family  
130 planning among women living with HIV changed over time?”; “What factors predict unmet need  
131 for family planning among women living with HIV in Zambia?” remain unanswered. Our study  
132 seeks to contribute to evidence in this regard and explore programmatic implications on the path  
133 to eMTCT of HIV in Zambia - a global priority country for HIV epidemic control and a recent global  
134 alliance on ending AIDS among children.

135 We argue that given centrality of prong 2 interventions in PMTCT of HIV and consequent HIV  
136 epidemic control, it is imperative to understand the trends and predictors of unmet need for  
137 family planning among women living with HIV. This is essential in designing interventions that  
138 would contribute to further reduction in MTCT of HIV.

## 139 **Methodology**

### 140 **Study Design and Data sources**

141 We undertook a secondary analysis of data from Demographic and Health Surveys (DHS)  
142 conducted in Zambia to understand trends and determinants of unmet need for family planning  
143 among women living with HIV. We adopted a repeated cross sectional (RCS) study design, using  
144 data from the three (3) most recent consecutive rounds of the Zambia Demographic and Health  
145 Survey (ZDHS). The RCS data structure is particularly beneficial because it introduces a dynamic  
146 component to the study of cross-sectional units and allows for the exploration of time-varying  
147 relationships which could broaden insight into the relationship being investigated (18)

148 Demographic and Health Surveys (DHS) are nationally representative population-based surveys  
149 conducted by the ICF Macro in collaboration with governments in about 90 countries, typically  
150 every four to five years. The DHS provide data on various health and demographic indicators  
151 including mortality, sexual and reproductive health, HIV, health status and health seeking, and  
152 child nutrition (19). In Zambia, five DHS have been conducted in 1992, 1996, 2001/02, 2007,  
153 2013/2014 and 2018 (16).

154 Based on comparable data and study focus, our study used DHS data from surveys conducted in  
155 2007, 2014 and 2018. The DHS use robust data quality assurance measures throughout the data  
156 collection and management process and the findings are highly regarded and used to inform  
157 policy and practice. We accessed all relevant DHS data sets upon request through the ICF Macro  
158 data management portal as custodians of DHS data. For each survey, two sets of data were  
159 availed, namely women's data file constituting all sociodemographic and sexual and reproductive  
160 health data including family planning, and the HIV data file that included data on HIV testing and  
161 results.



## 162 **Definition of variables**

163 In DHS, unmet need for family planning is typically defined to encompass two main groups,  
164 namely: (i) unmet need for spacing which means fecund women of childbearing age who would  
165 want to space their birth intervals but are currently not on any modern contraceptive method  
166 and (ii) unmet need for limiting referring to fecund women of childbearing age who would desire  
167 no additional children and are presently not on any modern contraceptive method (20).

168 Our outcome variable definition was consistent with the DHS variable definition albeit  
169 recognising that some discourse has contested and cited various challenges with the indicator  
170 definition. Some salient issues and challenges raised include, that: “users of traditional methods  
171 are treated as non-users based on the implicit assumption that they lack access to or information  
172 concerning more effective alternatives; the concept of unmet need is based on the discrepancy  
173 between the future bearing wishes and contraceptive use rather than from a direct expression  
174 of need by respondents”, and that all estimates of unmet need are exclusively based on women’s  
175 reports (21). This notwithstanding, information on unmet need for family planning generated by  
176 DHS still reflects an acceptable measure and has been useful in informing policy and practice for  
177 many years.

178 To ascertain the relationship between different individual characteristics and unmet need for  
179 family planning among women living with HIV, we included several demographic and  
180 socioeconomic variables. The socioeconomic indicators we adopted included highest level of  
181 education, religion, whether respondent has worked in the past 12 months and the eligible  
182 women’s wealth level proxied by a wealth index. Demographic variables included age, partner’s

183 age, and area of residence. Other variables included the total number of children ever born to a  
184 woman, partner's education level, visit to health facility in the past year as well as whether the  
185 respondent is the primary decision maker on their health.

## 186 **Data Synthesis and Analysis**

187 In the first stage of data synthesis, we merged two data sets (i.e. women's HIV data set and family  
188 planning data set) from the ZDHS for the years 2007, 2013/14 and 2018 using the unique  
189 identification codes for the survey participants. This was done to accurately link the same  
190 participants from the two data sets to ensure that, although compiled separately, the two data  
191 sets were effectively linked to the extent that the family planning data and HIV data at individual  
192 level were indeed for the same woman.

193 Using the HIV test result data, we extracted married women who had a positive HIV test result  
194 as a subgroup of interest and were able to ascertain their status regarding family planning,  
195 specifically whether the need for family planning was met or unmet.

196 We calculated unmet need for family planning for women living with HIV using the standard DHS  
197 definition for each DHS data. We then undertook trend analysis using DHS surveys as data time  
198 points to observe any changes in unmet need for family planning among women living with HIV  
199 over time.

200 To determine the factors associated with unmet need for family planning amongst married  
201 women living with HIV in Zambia, we adopted a logistic regression analysis. We chose the logistic  
202 regression model because it is a widely used and accepted method of analysis for binary

203 outcomes which is easy to execute and interpret (21) It also has notable advantages over the  
204 simple OLS regression analysis or Linear Probability Model such as better accuracy particularly  
205 with simpler datasets as well as a lower tendency towards over-fitting in non-complex datasets.  
206 Further, the multivariate logistic regression can be used to estimate probabilities and odds ratios  
207 while controlling for confounding variables.

## 208 **Results**

### 209 **Sociodemographic characteristics**

210 Our study included a total of 34,204 women aged 15-49 years that were representative of the  
211 three survey points, 2007, 2013/14 and 2018. Of the total women aged 15-49 years over the 3  
212 survey periods, 4,985 (15%) were HIV positive, among whom 2,675 (53%) were married and  
213 formed the study sample. The HIV results are based on the robust HIV testing algorithm of the  
214 DHS. In respective DHS, the HIV prevalence ranged from 14% in 2018 to 16% in 2007.

215 Sociodemographic characteristics of our sample are as presented in table 1. On aggregate,  
216 respondents had predominantly attained primary education (48%), with the majority being urban  
217 residents (62%). Women aged 25-39 years accounted for about two thirds of the sample and  
218 close to two thirds were in the fourth (richer) and fifth (richest) wealth quintiles. The mean age  
219 of partners to women included in the sample was 40 (SD 0.24) and on average, women included  
220 in the study had about 4 children. The 2013/14 DHS period had the largest contribution to the  
221 overall sample

### 222 **Table 1: Sociodemographic characteristics of participants**

It is made available under a [CC-BY 4.0 International license](https://creativecommons.org/licenses/by/4.0/) .

| Variable            | Married Women Living<br>with HIV<br>(N= 2,675) |       | Married Women Living<br>with HIV with met<br>need for FP<br>(N=1884) |       | Married Women Living<br>with HIV with un-met<br>need for FP<br>(N=556) |     |
|---------------------|------------------------------------------------|-------|----------------------------------------------------------------------|-------|------------------------------------------------------------------------|-----|
|                     | Percent                                        | n     | Percent                                                              | n     | Percent                                                                | n   |
| <b>Residence</b>    |                                                |       |                                                                      |       |                                                                        |     |
| Rural               | 37.9%                                          | 1,081 | 76%                                                                  | 745   | 24%                                                                    | 237 |
| Urban               | 62.1%                                          | 1,594 | 78%                                                                  | 1,139 | 22%                                                                    | 319 |
| <b>Age</b>          |                                                |       |                                                                      |       |                                                                        |     |
| 15-19               | 2.0%                                           | 56    | 71%                                                                  | 40    | 29%                                                                    | 16  |
| 20-24               | 11.3%                                          | 316   | 83%                                                                  | 258   | 17%                                                                    | 53  |
| 25-29               | 21.0%                                          | 568   | 81%                                                                  | 442   | 19%                                                                    | 105 |
| 30-34               | 23.7%                                          | 610   | 77%                                                                  | 449   | 23%                                                                    | 132 |
| 35-39               | 20.3%                                          | 536   | 76%                                                                  | 378   | 24%                                                                    | 117 |
| 40-44               | 14.2%                                          | 383   | 72%                                                                  | 235   | 28%                                                                    | 91  |
| 45-49               | 7.4%                                           | 206   | 67%                                                                  | 82    | 33%                                                                    | 42  |
| <b>Education</b>    |                                                |       |                                                                      |       |                                                                        |     |
| No Education        | 7.4%                                           | 206   | 74%                                                                  | 129   | 26%                                                                    | 47  |
| Primary             | 48.3%                                          | 1,292 | 73%                                                                  | 856   | 27%                                                                    | 318 |
| Secondary           | 38.7%                                          | 1,016 | 82%                                                                  | 773   | 18%                                                                    | 170 |
| Higher              | 5.7%                                           | 161   | 87%                                                                  | 126   | 13%                                                                    | 21  |
| <b>Wealth Index</b> |                                                |       |                                                                      |       |                                                                        |     |
| Poorest             | 8.8%                                           | 254   | 73%                                                                  | 169   | 27%                                                                    | 63  |

It is made available under a [CC-BY 4.0 International license](https://creativecommons.org/licenses/by/4.0/) .

|                           |             |           |             |           |             |           |
|---------------------------|-------------|-----------|-------------|-----------|-------------|-----------|
| Poorer                    | 11.3%       | 341       | 72%         | 223       | 28%         | 89        |
| Middle                    | 17.5%       | 568       | 74%         | 384       | 26%         | 143       |
| Richer                    | 32.3%       | 798       | 78%         | 571       | 22%         | 154       |
| Richest                   | 30.0%       | 714       | 82%         | 537       | 18%         | 107       |
| <b>Religion</b>           |             |           |             |           |             |           |
| Catholic                  | 16.6%       | 448       | 81%         | 329       | 19%         | 80        |
| Protestant                | 81.2%       | 2,178     | 77%         | 1,528     | 23%         | 459       |
| Muslim                    | 0.6%        | 16        | 55%         | 9         | 45%         | 6         |
| Other                     | 1.6%        | 31        | 57%         | 18        | 43%         | 10        |
| <b>Year</b>               |             |           |             |           |             |           |
| 2007                      | 17.5%       | 504       | 74%         | 350       | 26%         | 128       |
| 2013                      | 45.8%       | 1,255     | 79%         | 914       | 21%         | 244       |
| 2018                      | 36.7%       | 916       | 77%         | 620       | 23%         | 184       |
| <b>Currently Working</b>  |             |           |             |           |             |           |
| No                        | 46.0%       | 1,191     | 75%         | 835       | 25%         | 268       |
| Yes                       | 54.0%       | 1,478     | 79%         | 1,045     | 21%         | 287       |
|                           | <b>Mean</b> | <b>SD</b> | <b>Mean</b> | <b>SD</b> | <b>Mean</b> | <b>SD</b> |
| <b>Partners Age</b>       | 39.73       | 0.24      | 38.59       | 0.25      | 41.06       | 0.61      |
| <b>Children Ever Born</b> | 3.56        | 0.05      | 3.4         | 0.10      | 4.20        | 0.05      |

223 Note: Data for some women living with HIV may have been excluded because some data elements were missing

224 **Levels and trends unmet need for contraceptives among married**  
 225 **women living with HIV**

226 Results show that over the three survey points, unmet need for family planning among married  
227 women living with HIV has marginally declined from 26% in 2007 to 21% in 2013/14 and increased  
228 slightly registering 23% in 2018 DHS (see table 1 and figure 1). Whilst there is a statistically  
229 significant difference between 2007 and 2013/18, the difference between 2018 and 2007 is not  
230 statistically significant (see table 2). Further analysis, disaggregating unmet needs for spacing and  
231 limiting reveal that the two categories contribute relatively the same to the overall unmet need  
232 for family planning with no survey point showing a difference of more than a percentage point.

233 **Insert Figure 2: Trends in unmet need for family planning among married women living with**  
234 **HIV**

235

236 **Factors associated with unmet need for family planning among married**  
237 **women living with HIV**

238 Table 2 presents results of our multilevel logistic regression analysis for factors associated with  
239 unmet need for family planning among married women living with HIV over the three Zambia  
240 DHS survey points. Compared to women residing in rural areas, urban women are less likely to  
241 have unmet need for family planning (OR = 0.6095% CI: 0.45 - 0.78). Age of women emerged as  
242 a significant predictor of unmet need for family planning with women aged 20-44 years having  
243 lesser odds of having unmet need for family planning compared to adolescent girls aged 15-19  
244 and the largest effect is observed in the 35-39 year old age group. There was no significant

245 difference between women aged 45 years and above compared to adolescent girls aged 15-19  
246 years.

247 Whilst there was no significant difference in unmet need for family planning among women in  
248 first two wealth quintiles (poorer and middle), compared to women in lowest (wealth quintile  
249 (poorest), those in fourth (richer) (OR = 0.54, 95% CI: 0.35 - 0.83) and fifth (richest) (OR = 0.39  
250 95% CI: 0.23 - 0.62) wealth quintiles had lesser odds of having unmet need for family planning.

251 The odds of having an unmet need for family planning increased with an increasing number of  
252 children ever born (parity) by their reproductive age at the point of the survey (OR = 1.13, 95%  
253 CI: 1.07– 1.19).

254 Women who were working at the time of the survey had less odds of having unmet need for  
255 family planning compared to women who reported not to be working (OR = 0.78, 95% CI: 0.64 -  
256 0.96). Of the three survey periods included in this study, women living with HIV were less likely  
257 to have an unmet need for family planning during the 2013/14 survey period relative to 2007  
258 albeit there was no significant difference between 2007 and 2018 survey points. Unmet need for  
259 family planning among women living with HIV increased with an increasing age of spouse/partner  
260 (OR = 1.02, 95% CI: 1.01 – 1.04).

261 Factors such as decision maker on health care, level of education and whether respondent visited  
262 health facility in 12 months preceding the survey, included in the regression model, were not  
263 significantly associated with unmet need for family planning.

264 **Table 2: Logistic regression results of factors associated with unmet need for family planning**  
265 **among married women living with HIV**

| <b>Dependent Variable:</b><br><b>Unmet Need for Family Planning</b> | <b>Logistic Regression with Odds Ratios</b> |           |           |     | <b>Average Marginal Effects</b> |           |           |     |
|---------------------------------------------------------------------|---------------------------------------------|-----------|-----------|-----|---------------------------------|-----------|-----------|-----|
| <b>Independent Variables</b>                                        | Coef                                        | [95% Conf | Interval] | Sig | dy/dx <sup>(a)</sup>            | [95% Conf | Interval] | Sig |
| <b>Total Children Ever Born</b>                                     | 1.133                                       | 1.070     | 1.199     | *** | 0.021                           | 0.011     | 0.030     | *** |
| <b>Place of Residence</b>                                           |                                             |           |           |     |                                 |           |           |     |
| Rural                                                               | 1.000                                       | -         | -         |     | -                               | -         | -         |     |
| Urban                                                               | 0.597                                       | 0.454     | 0.784     | *** | -0.085                          | -0.130    | -0.041    | *** |
| <b>Age Group</b>                                                    |                                             |           |           |     |                                 |           |           |     |
| 15-19                                                               | 1.000                                       | -         | -         |     | -                               | -         | -         |     |
| 20-24                                                               | 0.442                                       | 0.224     | 0.873     | **  | -0.160                          | -0.305    | -0.016    | **  |
| 25-29                                                               | 0.429                                       | 0.220     | 0.836     | **  | -0.166                          | -0.310    | -0.021    | **  |
| 30-34                                                               | 0.442                                       | 0.221     | 0.884     | **  | -0.161                          | -0.310    | -0.011    | **  |
| 35-39                                                               | 0.371                                       | 0.178     | 0.774     | *** | -0.189                          | -0.343    | -0.034    | *** |
| 40-44                                                               | 0.399                                       | 0.181     | 0.883     | **  | -0.177                          | -0.340    | -0.014    | **  |
| 45-49                                                               | 0.462                                       | 0.190     | 1.123     |     | -0.153                          | -0.332    | 0.026     |     |
| <b>Wealth Index</b>                                                 |                                             |           |           |     |                                 |           |           |     |
| Poorest                                                             | 1.000                                       | -         | -         |     | -                               | -         | -         |     |
| Poorer                                                              | 0.954                                       | 0.638     | 1.427     |     | -0.009                          | -0.090    | 0.072     |     |
| Middle                                                              | 0.863                                       | 0.585     | 1.274     |     | -0.029                          | -0.107    | 0.049     |     |
| Richer                                                              | 0.537                                       | 0.349     | 0.827     | *** | -0.111                          | -0.193    | -0.029    | *** |
| Richest                                                             | 0.378                                       | 0.230     | 0.620     | *** | -0.160                          | -0.247    | -0.074    | *** |
| <b>Highest Level of Education</b>                                   |                                             |           |           |     |                                 |           |           |     |
| No Education                                                        | 1.000                                       | -         | -         |     | -                               | -         | -         |     |
| Primary                                                             | 1.094                                       | 0.740     | 1.619     |     | 0.016                           | -0.051    | 0.083     |     |
| Secondary                                                           | 0.793                                       | 0.514     | 1.224     |     | -0.037                          | -0.109    | 0.035     |     |



It is made available under a [CC-BY 4.0 International license](https://creativecommons.org/licenses/by/4.0/) .

|                                       |       |       |         |     |        |        |        |     |
|---------------------------------------|-------|-------|---------|-----|--------|--------|--------|-----|
| Higher                                | 0.786 | 0.397 | 1.556   |     | -0.039 | -0.146 | 0.069  |     |
| <b>Currently Working</b>              |       |       |         |     |        |        |        |     |
| No                                    | 1.000 | -     | -       |     | -      | -      | -      |     |
| Yes                                   | 0.782 | 0.638 | 0.958   | **  | -0.041 | -0.075 | -0.007 | **  |
| <b>Year</b>                           |       |       |         |     |        |        |        |     |
| 2007                                  | 1.000 | .     | .       |     |        |        |        |     |
| 2013                                  | 0.656 | 0.503 | 0.854   | *** | -0.072 | -0.119 | -0.025 | *** |
| 2018                                  | 0.767 | 0.578 | 1.018   |     | -0.047 | -0.098 | 0.004  |     |
| <b>Visited Health Facility</b>        |       |       |         |     |        |        |        |     |
| No                                    | 1.000 | .     | .       |     |        |        |        |     |
| Yes                                   | 0.852 | 0.693 | 1.049   |     | -0.027 | -0.062 | 0.008  |     |
| <b>Partner's Age</b>                  | 1.024 | 1.009 | 1.039   | *** | 0.004  | 0.001  | 0.006  | *** |
| <b>Decision Maker for Health Care</b> |       |       |         |     |        |        |        |     |
| Respondent Alone                      | 1.000 | .     | .       |     | -      | -      | -      |     |
| Respondent and partner                | 0.823 | 0.658 | 1.029   |     | -0.032 | -0.069 | 0.005  |     |
| Husband/Partner Alone                 | 0.877 | 0.666 | 1.155   |     | -0.022 | -0.068 | 0.024  |     |
| Someone Else                          | 2.267 | 0.748 | 6.871   |     | 0.165  | -0.083 | 0.413  |     |
| Other                                 | 3.655 | 0.312 | 42.796  |     | 0.275  | -0.294 | 0.844  |     |
| Chi-square                            |       |       | 141.164 |     |        |        |        |     |
| Prob > chi2                           |       |       | 0.000   |     |        |        |        |     |
| Number of observations                |       |       | 2406    |     |        |        | 2406   |     |

266

## 267 Discussion

268 The study findings suggest that unmet need for family planning among married women living  
269 with HIV marginally declined from 2007 to 2013/14 and thereafter increased again with no  
270 statistically significant difference between 2007 and 2018 survey levels. Essentially it has hardly  
271 changed in a sustained positive direction (i.e. reduction in unmet need) for slightly more than a  
272 decade – a period covered by this study. There is paucity of evidence showing trends in  
273 contraceptive use among women living with HIV in similar contexts making comparison with our  
274 study a difficult endeavour. Nonetheless, findings from some cross-sectional studies show similar  
275 levels reported in different survey points in our study. For example, a meta-analysis of unmet  
276 need for family planning among reproductive age women living with HIV in Ethiopia reported a  
277 pooled prevalence of 25% (22). Similarly, an analysis of DHS data from twelve African countries  
278 with an HIV prevalence of more than 3%, including Zambia, showed an unmet need for family  
279 planning among women with HIV ranging from 9% to 23% (23)

280 With strategies on reducing unwanted pregnancies among women living with HIV indicated as an  
281 important prong in PMTCT of HIV for the past two decades, stagnation of unmet need for family  
282 planning in this population group reflects some shortcomings that warrant attention if benefits  
283 of prong 2 are to be optimally realised. In contrast, between 2010 and 2020, anti-retroviral  
284 treatment coverage among pregnant women living with HIV (prong 3) in Zambia markedly  
285 increased from 58% to >95% (9) effectively narrowing the treatment gap.

286 As expected, an increasing trend in ART coverage among pregnant women living with HIV has  
287 corresponded with a declining trend in new HIV infections among children. There is also evidence  
288 that even modest decreases in the number of pregnancies to HIV-positive women could  
289 significantly reduce new HIV infections among children from both women living with HIV who are

290 not on treatment (where prong 2 has the largest effect) and women living with HIV who are on  
291 treatment and desire to space or limit birthing (13). Moreover, some regional evidence suggests  
292 that an estimated “333,000 new infant infections could be averted annually, if all women in the  
293 sub-Saharan Africa who did not wish to become pregnant could have access to contraceptive  
294 services” (22). This evidence renders it highly probable that greater strides could have been made  
295 in reducing vertical transmission if unmet need for family planning reduced at a faster rate than  
296 current trends in Zambia.

297 Integrating family planning and ART services has emerged as one of the programming options to  
298 strengthen PMTCT prong 2 in many high HIV burden countries including Zambia. Multiple  
299 modalities such as; co-location of ART and family planning services, provider initiated family  
300 planning, capacity building of health workers for comprehensive SRH/HIV care (23 - 24) have  
301 been implemented with varying forms of design and results in different countries. In some cases  
302 this has yielded positive results with evidence from Ethiopia (25), Zambia (26) and Kenya (27))  
303 suggesting increased contraceptive uptake and conversely reduction of unmet need for family  
304 planning where family planning and HIV services were integrated. Evidence of user satisfaction  
305 with services has also emerged from a systematic reviews (28). However, these promising  
306 practices have either been implemented at a smaller scale or have not been fully integrated in  
307 the healthcare service delivery system resulting in limited nationwide benefits and impacts.  
308 Furthermore, evidence is still sparse on long term benefits of some integration models (29).  
309 Consequently, unmet need for family planning has hardly declined among women living with HIV  
310 as per our study findings.

311 Current discourse in PMTCT of HIV has rightly tended to focus on more targeted interventions  
312 informed by evidence on main sources of new HIV infections among children along the PMTCT  
313 cascade of care. In Zambia, evidence shows that incident maternal HIV infections especially in  
314 the breastfeeding period account for majority of mother to child transmissions (9). In this  
315 epidemiological context for PMTCT, strengthening family planning services through integration  
316 with HIV services in the postpartum period, serves two integral functions for PMTCT of HIV.

317 Firstly, quality family planning counselling emphasizes dual protection from pregnancy and  
318 Sexually Transmitted Infections hence stands to directly contribute to reducing incident  
319 infections. Evidently, a study in Kenya found that integrating family planning and HIV services  
320 contributed to uptake of dual methods of protection from pregnancy and STI including HIV (27).

321 Secondly, for women who still acquire HIV during the breastfeeding period, it offers a choice at  
322 an early stage of HIV infection, to prevent unwanted pregnancies subsequently, fully exploiting  
323 the benefits of prong 2.

324 Our analysis revealed that geographical residence (rural vs urban), age of woman, socioeconomic  
325 status, number of children ever born to a woman (parity), employment status and partner's age  
326 constituted factors significantly associated with unmet need for family planning. These findings  
327 are largely consistent with other studies (22, 30-31) including a Zambian study which analysed  
328 unmet need for family planning using the 2018 DHS data (30). From a review of literature  
329 predictors of contraceptive uptake and unmet need for family planning are similar for HIV  
330 positive and HIV negative women.

331 Evidently, similar to our findings, studies in Tigray (32) and Dire Dawa (33) in Ethiopia, Nigeria  
332 (34) and India (35) found that women living with HIV residing in rural areas were more likely to  
333 have unmet need for family planning than their counterparts from the urban areas. The probable  
334 explanation for this phenomenon is that women in rural areas have lower exposure to  
335 information and limited access to sexual and reproductive health services than their urban  
336 counterparts, as reported in surveys in Zambia and elsewhere (30, 31). Furthermore, in the  
337 Zambia country context, women in rural areas are arguably impacted more than their urban  
338 counterparts by other barriers to uptake of family planning services such as some deeply  
339 engrained cultural practices that propagate hesitancy to contraceptives and those that affect the  
340 autonomy of women to make reproductive choices.

341 Women in high socioeconomic status had lesser odds of having unmet need for family planning  
342 than their counterparts in lower socioeconomic strata. This renders support to similar findings  
343 reported in other studies in Ghana (36), Pakistan (37) and Ethiopia (38). The underlying  
344 explanation for this association is that women from wealthier households have greater ability to  
345 pay for direct and indirect costs associated with accessing modern contraceptive methods and  
346 are more likely to have better access to information on contraceptives and services than women  
347 from poorer households (39)

348 Consistent with other studies (23, 38, 40-41), our study found that women's age is a significant  
349 predictor of unmet need for family planning. The pattern of association shows that women aged  
350 20 to 44 years are less likely to have unmet need for family planning relative to younger women  
351 (below 20 years) although there is no statistically significant difference between older women  
352 (above 45 years) and younger ones (see table 2). This phenomenon may be explained by the

353 comparator age group of adolescence (15-19 years) granted established evidence of multiple  
354 barriers to accessing family planning services for adolescent girls. These include stigma and  
355 discrimination, unfriendly attitude of health providers, inadequate information about  
356 contraceptives (42-44). However, the pathways explaining no difference between older and  
357 younger women are unclear albeit may be related to low-risk perception pertaining to unwanted  
358 pregnancy as reproductive age increases. It is worthwhile to note that another finding of this  
359 study suggests that unmet need for family planning among women living with HIV increased with  
360 an increasing age of spouse, a phenomenon that could be related to partner's decision-making  
361 dynamics. Programmatic implications related to ongoing education and counselling on  
362 reproductive health choices throughout the reproductive period are therefore apparent.

363 Our study findings also suggest that the more children a woman has the higher the chances they  
364 have an unmet need for family planning. This is in line with study findings from Zambia (30)  
365 Ethiopia (45-46) and Kenya (47) including a multi-country study that analysed nineteen DHS  
366 survey data from Sub-Sahara Africa (48). It is probable that with higher parity, women will have  
367 attained the desired number of children hence a greater need for limiting and in the context of  
368 limited access to contraceptive services the unmet need is potentially high. Consequently, a  
369 programming implication entails the need for targeted family planning education and counselling  
370 for women with higher parity.

371 Our study confirmed findings of earlier studies (37) where employed women had less odds of  
372 unmet need for family planning. The causal pathways for this phenomenon relate to the potential  
373 for employed women to be more empowered, have the financial capacity, better exposure to  
374 information to make reproductive health choices including uptake of family planning services.

375 While education has been shown to be a significant predictor of contraceptive uptake, and  
376 conversely of unmet need for family planning among women in other studies (33-34, 49), our  
377 findings did not demonstrate any association. It is however consistent with a study in Zambia that  
378 used the 2018 DHS data and involved all married women (not merely those with an HIV positive  
379 result) (30). The mechanism for this phenomenon (lack of association with education) is unclear  
380 although it points to the importance of emphasizing family planning specific education and  
381 counselling irrespective of a woman's education level.

382 Our study strengths relate to the use of data from DHS which are large population-based surveys  
383 considered robust enough to be nationally representative and frequently used to inform policy  
384 and practice. One salient limitation is that, while trends from cross-sectional survey points are  
385 useful and in our study context, most appropriate, they are not as robust as longitudinal studies  
386 for which temporal relationship should have been better defined. Other limitations common to  
387 surveys including recall and reporting bias are also applicable to our study although we  
388 acknowledge the rigor of DHS in minimizing these biases.

## 389 **Conclusion**

390 Our study findings show that unmet need for family planning among women living with HIV have  
391 stagnated for more than a decade despite a long-standing programming context and evidence  
392 on the need to improve contraceptive uptake for women living with HIV not desiring to have  
393 children as part of PMTCT of HIV and improving maternal health.

394 Preventing one HIV infection in a child is averting lifetime costs of HIV treatment and associated  
395 healthcare costs. Granted that advancing PMTCT prong 2 is evidence based, it is imperative that

396 significant efforts are invested in reducing unmet need for contraceptives among women living  
397 with HIV. The findings of this study point to various other implications for policy and practice.  
398 There is need to consider optimization of PMTCT interventions including shaping programming  
399 regarding prong 2 in a way that it responds to main causes of mother to child transmissions in  
400 Zambia. Strengthening and scaling up integration of SRHR/HIV and SGBV services including family  
401 planning and HIV prevention, care and treatment programme remains an option for which  
402 evidence of effectiveness and examples for implementation modalities already exist. The extent  
403 to which Zambia pursues the last mile towards path to elimination of mother to child  
404 transmission of HIV partly depends on optimization of proven cost-effective interventions.  
405 Reducing unmet need for contraceptives among women living with HIV continues to hold  
406 promise in this regard.

407

## 408 **Acknowledgements**

409 The authors acknowledge the DHS Program for allowing access to the DHS data sets for Zambia  
410 which enabled us to undertake analysis and produce this manuscript.

411

## 412 **References**

- 413 1. Sperling RS, Shapiro DE, Coombs RW, Todd JA, Herman SA, McSherry GD, et al. Maternal  
414 viral load, zidovudine treatment, and the risk of transmission of human immunodeficiency



- 415 virus type from mother to infant. Pediatric AIDS Clinical Trials Group Protocol 076 Study  
416 Group. New England Journal Med. 1996; 335(22): 1621-9. 3.
- 417 2. Guay LA, Musoke P, Fleming T, Bagenda D, Allen M, Nakabiito C, et al. Intrapartum and  
418 neonatal single-dose nevirapine compared with zidovudine for prevention of mother-to-  
419 child transmission of HIV1 in Kampala, Uganda: HIVNET 012 randomised trial. Lancet.  
420 1999; 354(9181): 795-802.
- 421 3. Shaffer N, Chuachoowong R, Mock PA, Bhadrakom C, Siriwasin W, Young NL, et al . Short-  
422 course zidovudine for perinatal HIV-1 transmission in Bangkok, Thailand: a randomised  
423 controlled trial. Bangkok Collaborative Perinatal HIV Transmission Study Group. Lancet.  
424 1999; 353(9155)
- 425 4. WHO. Prevention of Mother-To-Child Transmission (PMTCT) Briefing Note October 1st,  
426 2007. Available from:  
427 <https://www.who.int/hiv/pub/toolkits/PMTCT%20HIV%20Dept%20brief%20Oct%2007.pdf>  
428 [f](https://www.who.int/hiv/pub/toolkits/PMTCT%20HIV%20Dept%20brief%20Oct%2007.pdf)
- 429 5. Interagency Task Team (IATT) on Prevention of HIV Infection in Pregnant Women,  
430 Mothers and their Children . Guidance on global scale-up of the prevention of mother to  
431 child transmission of HIV: towards universal access for women, infants, and young  
432 children and eliminating HIV and AIDS among children. 2007. Available from:  
433 <https://apps.who.int/iris/handle/10665/43728>.
- 434 6. Hairston, A.F., Bobrow, E.A., & Pitter, C.S. (2012) Towards the Elimination of Pediatric HIV:  
435 Enhancing Maternal, Sexual, and Reproductive Health Services. International Journal of  
436 Maternal and Child Health and AIDS: 2012; 1(1): 6–16.

- 437 7. WHO. Antiretroviral treatment as prevention (TasP) of HIV and TB.2012. Available from:  
438 [https://apps.who.int/iris/bitstream/handle/10665/70904/WHO\\_HIV\\_2012.12\\_eng.pdf?se](https://apps.who.int/iris/bitstream/handle/10665/70904/WHO_HIV_2012.12_eng.pdf?sequence=1)  
439 [quence=1](https://apps.who.int/iris/bitstream/handle/10665/70904/WHO_HIV_2012.12_eng.pdf?sequence=1)
- 440 8. UNAIDS. Invest in HIV Prevention: quarter for HIV prevention. Available from:  
441 [https://www.unaids.org/sites/default/files/media\\_asset/JC2791\\_invest-in-HIV-](https://www.unaids.org/sites/default/files/media_asset/JC2791_invest-in-HIV-prevention_en.pdf)  
442 [prevention\\_en.pdf](https://www.unaids.org/sites/default/files/media_asset/JC2791_invest-in-HIV-prevention_en.pdf)
- 443 9. UNAIDS. 2021. Available from: <https://aidsinfo.unaids.org/>
- 444 10. UNAIDS and PEPFAR. 2015 progress on the global plan towards the elimination of new HIV  
445 infections among children and keeping their mothers alive. 2015. Available from:  
446 [https://www.unaids.org/sites/default/files/media\\_asset/JC2774\\_2015ProgressReport\\_Gl](https://www.unaids.org/sites/default/files/media_asset/JC2774_2015ProgressReport_GlobalPlan_en.pdf)  
447 [obalPlan\\_en.pdf](https://www.unaids.org/sites/default/files/media_asset/JC2774_2015ProgressReport_GlobalPlan_en.pdf).
- 448 11. Reynolds HW, Janowitz B, Wilcher R, Cates W. Contraception to prevent HIV-positive  
449 births: current contribution and potential cost savings in PEPFAR countries. *BMJ Journals*.  
450 2008; 84 (2) 49-53. doi: 10.1136/sti.2008.030049
- 451 12. Hladik W, Stover J, Esiru G, Harper M, Tappero J. The Contribution of family planning  
452 towards the prevention of vertical HIV transmission in Uganda. *PLoS One*. 2009; 4(11):  
453 doi: 10.1371/journal.pone.0007691
- 454 13. Sherwood J, Lankiewicz E, Roose-Snyder B, Cooper B , Jones A, Honermann B. The role of  
455 contraception in preventing HIV-positive births: global estimates and projections. *BMC*  
456 *Public Health*. 2021; 21:536 <https://doi.org/10.1186/s12889-021-10570-w>
- 457 14. Ministry of Health. National plan for the elimination of Mother To Child Transmission of  
458 HIV and syphilis. Lusaka, Zambia.

- 459 15. WHO. Global guidance on criteria and processes for validation: elimination of mother-to-  
460 child transmission of HIV, syphilis and Hepatitis B virus. Geneva: World Health  
461 Organization; 2021.
- 462 16. The DHS Program. Zambia Demographic and Health Survey 2018
- 463 17. Hancock NL, Chibwesa CJ, Bosomprah S, Newman J, Mubiana-Mbewe M, Sitali ES, Chi  
464 BH. Contraceptive use among HIV-infected women and men receiving antiretroviral  
465 therapy in Lusaka, Zambia: a cross-sectional survey. BMC Public Health. 2016;16(1):392
- 466 18. Matthew J, Lebo, Weber W. An effective approach to the repeated cross-sectional design.  
467 American Journal of Political Science. 59(1) DOI:10.1111/ajps.12095
- 468 19. The DHS Program. Available from: [http://dhsprogram.com/What-We-Do/Survey-](http://dhsprogram.com/What-We-Do/Survey-Types/DHS.cfm)  
469 [Types/DHS.cfm](http://dhsprogram.com/What-We-Do/Survey-Types/DHS.cfm).
- 470 20. MEASURE DHS. Family planning and Reproductive health indicators database: Unmet  
471 need for family planning. Available from:  
472 [https://www.measureevaluation.org/prh/rh\\_indicators/family-planning/fp/unmet-need-](https://www.measureevaluation.org/prh/rh_indicators/family-planning/fp/unmet-need-for-family-planning)  
473 [for-family-planning](https://www.measureevaluation.org/prh/rh_indicators/family-planning/fp/unmet-need-for-family-planning)
- 474 21. Hosmer DW, Hosmer T, Cessie SLE, Lemeshow S. A comparison of goodness-of-fit tests for  
475 the logistic regression model. 1997; 1996:965–80.
- 476 22. Kefale B, Adane B, Damtie Y, Arefaynie M, Yalew M, Andargie A. Unmet need for family  
477 planning among reproductive-age women living with HIV in Ethiopia: a systematic review  
478 and meta-analysis. PLoS ONE. 2021; 16(8): e0255566.  
479 <https://doi.org/10.1371/journal.pone.0255566>

- 480 23. MacQuarrie KLD. Unmet need for family planning among young women: levels and trends.  
481 DHS Comparative Reports No. 34. Rockville, Maryland, USA: ICF International; 2014. 58.
- 482 24. Nkhoma L, Sitali DC, Zulu JM. Integration of family planning into HIV services: a  
483 systematic review. *Annals of Medicine*. 2022; 54:1, 393-403, DOI:  
484 <https://doi.org/10.1080/07853890.2021.2020893>
- 485 25. Demissie DB, Mmusi-Phetoe R. Integration of family planning services with HIV treatment  
486 for women of reproductive age attending ART clinic in Oromia regional state, Ethiopia.  
487 *Reprod Health*. 2021; 18, 102: <https://doi.org/10.1186/s12978-021-01157-0>
- 488 26. Hancock NL, Vwalika B, Sitali ES, Mbwili-Muleya C, Chi BH, Stuart GS. Evaluation of service  
489 quality in family planning clinics in Lusaka, Zambia. *Contraception*. 2015;92(4): 345-9. doi:  
490 10.1016/j.contraception.2015.06.025
- 491 27. Chen Y, Begnel E, Muthigani W, Achwoka D, Mcgrath CJ, Singa B, Gondi J, Ng'ang'a L,  
492 Langat A, John-Stewart G, Kinuthia J, Drake AL. Higher contraceptive uptake in HIV  
493 treatment centers offering integrated family planning services: a national survey in Kenya.  
494 *Contraception*. 2020;102(1): 39-45. doi: 10.1016/j.contraception.2020.04.003.
- 495 28. Narasimhan M, Yeh PT, Haberlen S. et al. Integration of HIV testing services into family  
496 planning services: a systematic review. *Reprod Health*. 16 (1), 61 (2019).  
497 <https://doi.org/10.1186/s12978-019-0714-9>
- 498 29. Lindegren ML, Kennedy CE, Bain-Brickley D, Azman H, Creanga AA, Butler LM, Spaulding  
499 AB, Horvath T, Kennedy GE. Integration of HIV/AIDS services with maternal, neonatal and  
500 child health, nutrition, and family planning services. *Cochrane Database of Systematic*  
501 *Reviews*. 2012; 9.DOI: 10.1002/14651858.CD010119.

- 502 30. Namukoko H, Likwa R.N, Hamoonga TE, Phiri M. Unmet need for family planning among  
503 married women in Zambia: lessons from the 2018 Demographic and Health Survey. BMC  
504 Women's Health. 2022; 22, 137. <https://doi.org/10.1186/s12905-022-01709-x>
- 505 31. Anik AI, Islam MR, Rahman MS. Association between socioeconomic factors and unmet  
506 need for modern contraception among the young married women: A comparative study  
507 across the low- and lower-middle-income countries of Asia and Sub-Saharan Africa. PLOS  
508 Glob Public Health. 2022; 2(7): e0000731. <https://doi.org/10.1371/journal.pgph.0000731>
- 509 32. Melaku YA, Zeleke EG. Contraceptive utilization and associated factors among HIV positive  
510 women on chronic follow up care in Tigray region, Northern Ethiopia: A cross sectional  
511 study. PLoS One. 2014; 9 (4):1–10. <https://doi.org/10.1371/journal.pone.0094682> PMID:  
512 24743241
- 513 33. Dejene H, Abera M, Tadele A. Unmet need for family planning and associated factors  
514 among married women attending antiretroviral treatment clinics in Dire Dawa City,  
515 Eastern Ethiopia. PLoS ONE. 2021; 16(4):  
516 e0250297. <https://doi.org/10.1371/journal.pone.0250297>
- 517 34. Fagbamigbe AF, Afolabi RF, Idemudia ES. Demand and unmet needs of contraception  
518 among sexually active in-union women in Nigeria: Distribution, associated characteristics,  
519 barriers, and program implications. SAGE Open. 2018; 8(1).  
520 <https://doi.org/10.1177/2158244017753046> PMID: 30221033
- 521 35. Koshewara P, Fuke RP. Identifying the Unmet need of contraception among HIV  
522 seropositive women attending Antiretroviral Treatment (ART) clinic in tertiary care centre.  
523 J Evid Based Med Healthcare. 2019; 6(11):893–8

- 524 36. Lauro D. Abortion and contraceptive use in sub-Saharan Africa: how women plan their  
525 families. *Afr J Reprod Health/La Revue Africaine De La Santé Reproductive*. 2011;  
526 15(1):13–23
- 527 37. Asif MF, Pervaiz Z. Socio-demographic determinants of unmet need for family planning  
528 among married women in Pakistan. *BMC Public Health*. 2019;19(1):1–8.
- 529 38. Tadele A, Abebaw D, Ali R. Predictors of unmet need for family planning among all women  
530 of reproductive age in Ethiopia. *Contracept Reprod Med*. 2019; 4(1):6
- 531 39. Ahinkorah BO, Ameyaw EK, Seidu AA, Ahinkorah, et al. Socio-economic and demographic  
532 predictors of unmet need for contraception among young women in sub-Saharan Africa:  
533 evidence from cross-sectional surveys. *Reprod Health*.2020: 17:163  
534 <https://doi.org/10.1186/s12978-020-01018-2>
- 535 40. Juarez F, Gayet C, Mejia-Pailles G. Factors associated with unmet need for contraception  
536 in Mexico: evidence from the National Survey of demographic dynamics 2014. *BMC*  
537 *Public Health*. 2018;18 (1):546.
- 538 41. Dejenu G, Ayichiluhm M, Abajobir AA. Prevalence and associated factors of unmet need  
539 for family planning among married women in Enemay District, Northwest Ethiopia: a  
540 comparative cross-sectional study. *J Community Med Health Educ*. 2013; 13:4.
- 541 42. Bain EL, Amu H, Tarkang EE. Barriers and motivators of contraceptive use among young  
542 people in Sub-Saharan Africa: a systematic review of qualitative studies. *PLoS ONE*. 2021;  
543 16(6): e0252745. <https://doi.org/10.1371/journal.pone.0252745>
- 544 43. Ochako R, Mbondo M, Aloo S, Kaimenyi S, Thompson R, Temmerman M, et al. Barriers to  
545 modern contraceptive methods uptake among young women in Kenya: a qualitative

- 546 study. BMC public health. 2015; 15(1):118. <https://doi.org/10.1186/s12889-015-1483-1>
- 547 PMID: 25884675 25.
- 548 44. Hokororo A, Kihunrwa AF, Kalluvya S, Chagalucha J, Fitzgerald DW, Downs JA. Barriers to
- 549 access reproductive health care for pregnant adolescent girls: a qualitative study in
- 550 Tanzania. Actapaediatrica. 2015; 104 (12):1291–7. <https://doi.org/10.1111/apa.12886>
- 551 PMID: 25473729
- 552 45. Hailemariam A, Haddis F. Factors affecting unmet need for family planning in southern
- 553 nations, nationalities and peoples region, Ethiopia. Ethiopian journal of health sciences.
- 554 2011; 21(2):77–90. <https://doi.org/10.4314/ejhs.v21i2.69048> PMID: 22434988
- 555 46. Ayele W, Tesfaye H, Gebreyes R, Gebreselassie T. Trends and determinants of unmet need
- 556 for family planning and programme options, Ethiopia: Further analysis of the 2000, 2005,
- 557 and 2011 Demographic and Health Surveys. Calverton, Maryland, USA: ICF International;
- 558 2013.
- 559 47. Wafula SW. Regional differences in unmet need for contraception in Kenya: insights from
- 560 survey data. BMC Women's Health. 2015; 15(1):86. [https://doi.org/10.1186/s12905-015-](https://doi.org/10.1186/s12905-015-0240-z)
- 561 [0240-z](https://doi.org/10.1186/s12905-015-0240-z) PMID: 26466670 29.
- 562 48. Teshale AB. Factors associated with unmet need for family planning in Sub-Saharan Africa:
- 563 A multilevel multinomial logistic regression analysis. PLoS ONE. 2022; 17(2).
- 564 <https://doi.org/10.1371/journal.pone.0263885>
- 565 49. Wulifan JK, BrennerS, Jahn A. et al. A scoping review on determinants of unmet need for
- 566 family planning among women of reproductive age in low and middle income countries.
- 567 BMC Women's Health. 2015; 16 (2). <https://doi.org/10.1186/s12905-015-0281-3>

- 568 50. Cleland J, Harbison S and Shah IH. 2014. "Unmet need for contraception: Issues and  
569 challenges." *Studies in Family Planning* 45(2): 105-122
- 570 51. UNAIDS. The Global plan to eliminate new HIV infections among children and keeping  
571 their mothers alive. 2011; Available from:  
572 [https://www.unaids.org/sites/default/files/media\\_asset/JC2774\\_2015ProgressReport\\_GlobalPlan\\_en.pdf](https://www.unaids.org/sites/default/files/media_asset/JC2774_2015ProgressReport_GlobalPlan_en.pdf) .  
573

## 574 **Supporting Information**

575 S1 Fig 1: Four prongs for comprehensive prevention of mother to child transmission of HIV

576 S2 Fig 2: Trends in unmet need for family planning among married women living with HIV

577



medRxiv preprint doi: <https://doi.org/10.1101/2022.11.24.22282709>; this version posted November 28, 2022. The copyright holder for this preprint (which was not certified by peer review) is the author/funder, who has granted medRxiv a license to display the preprint in perpetuity. It is made available under a [CC-BY 4.0 International license](#).

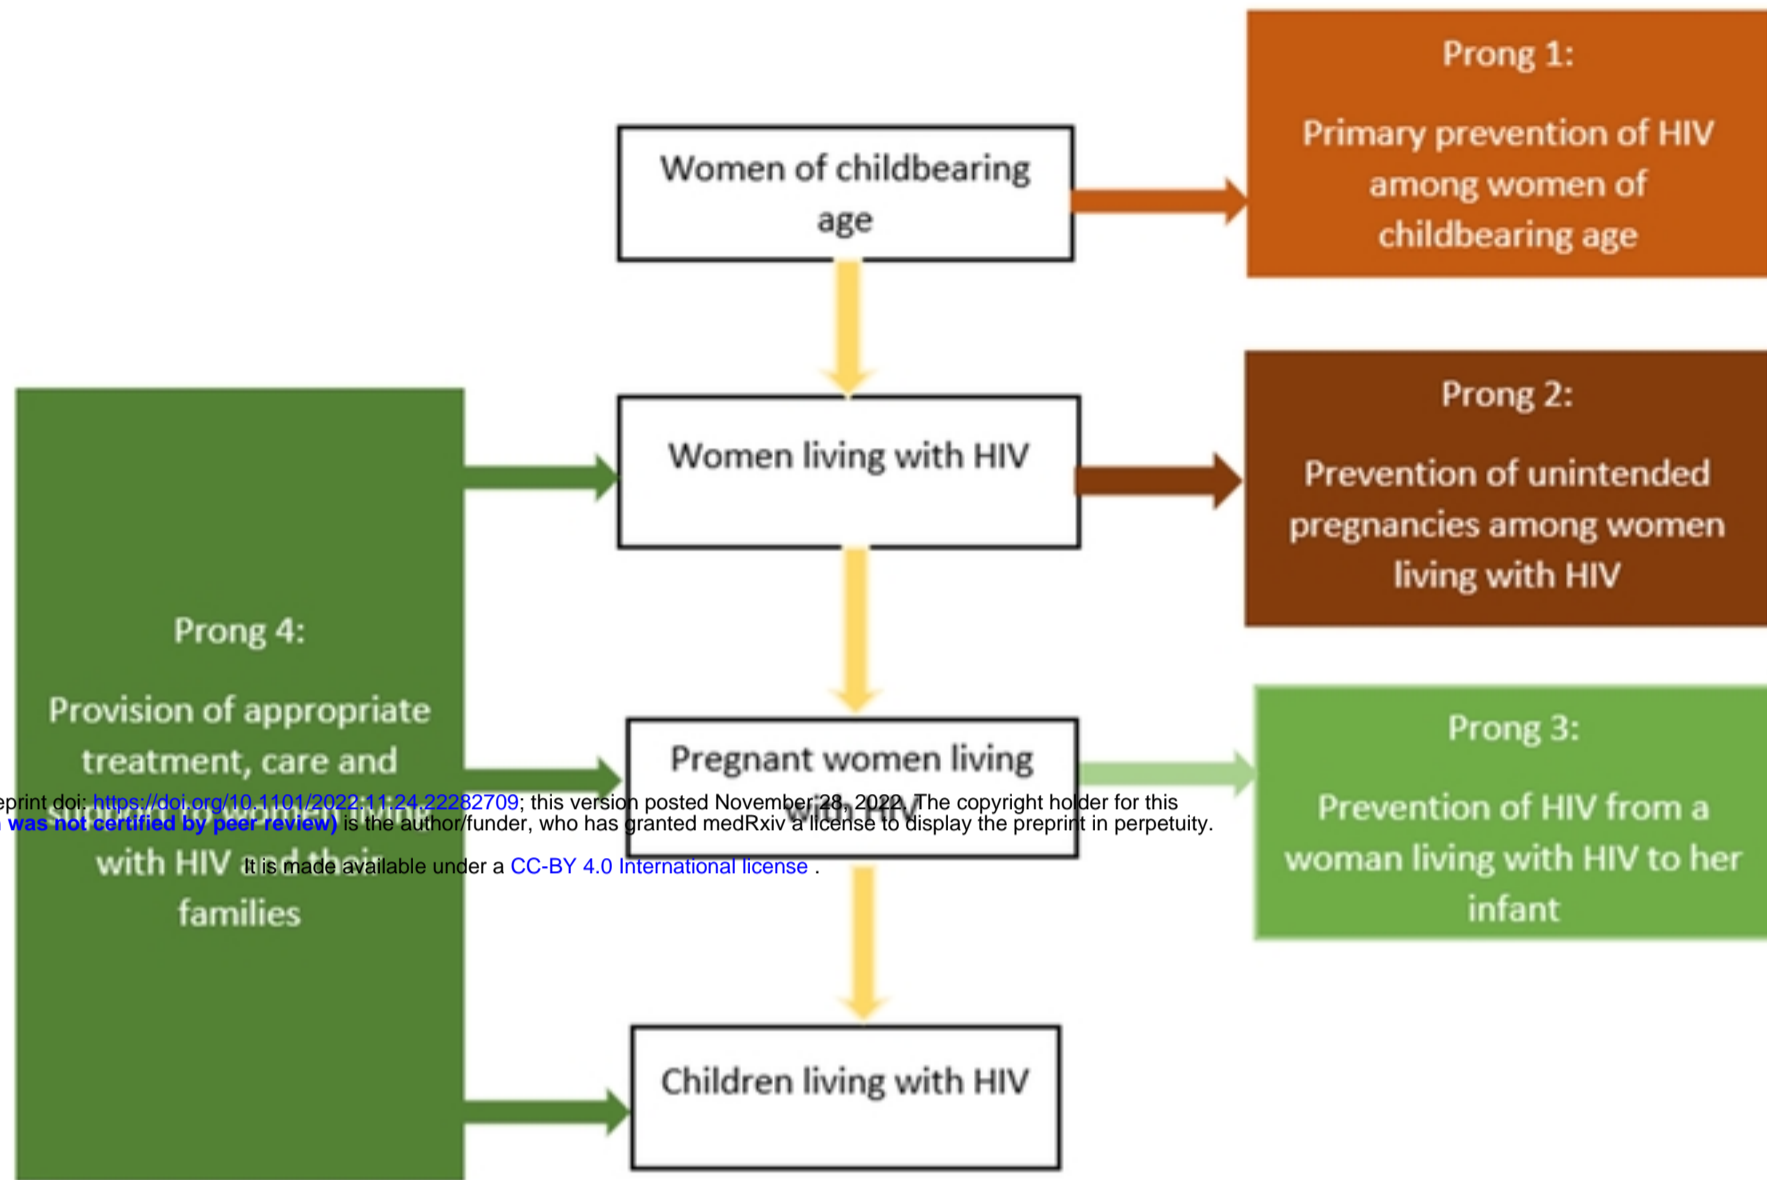

Figure

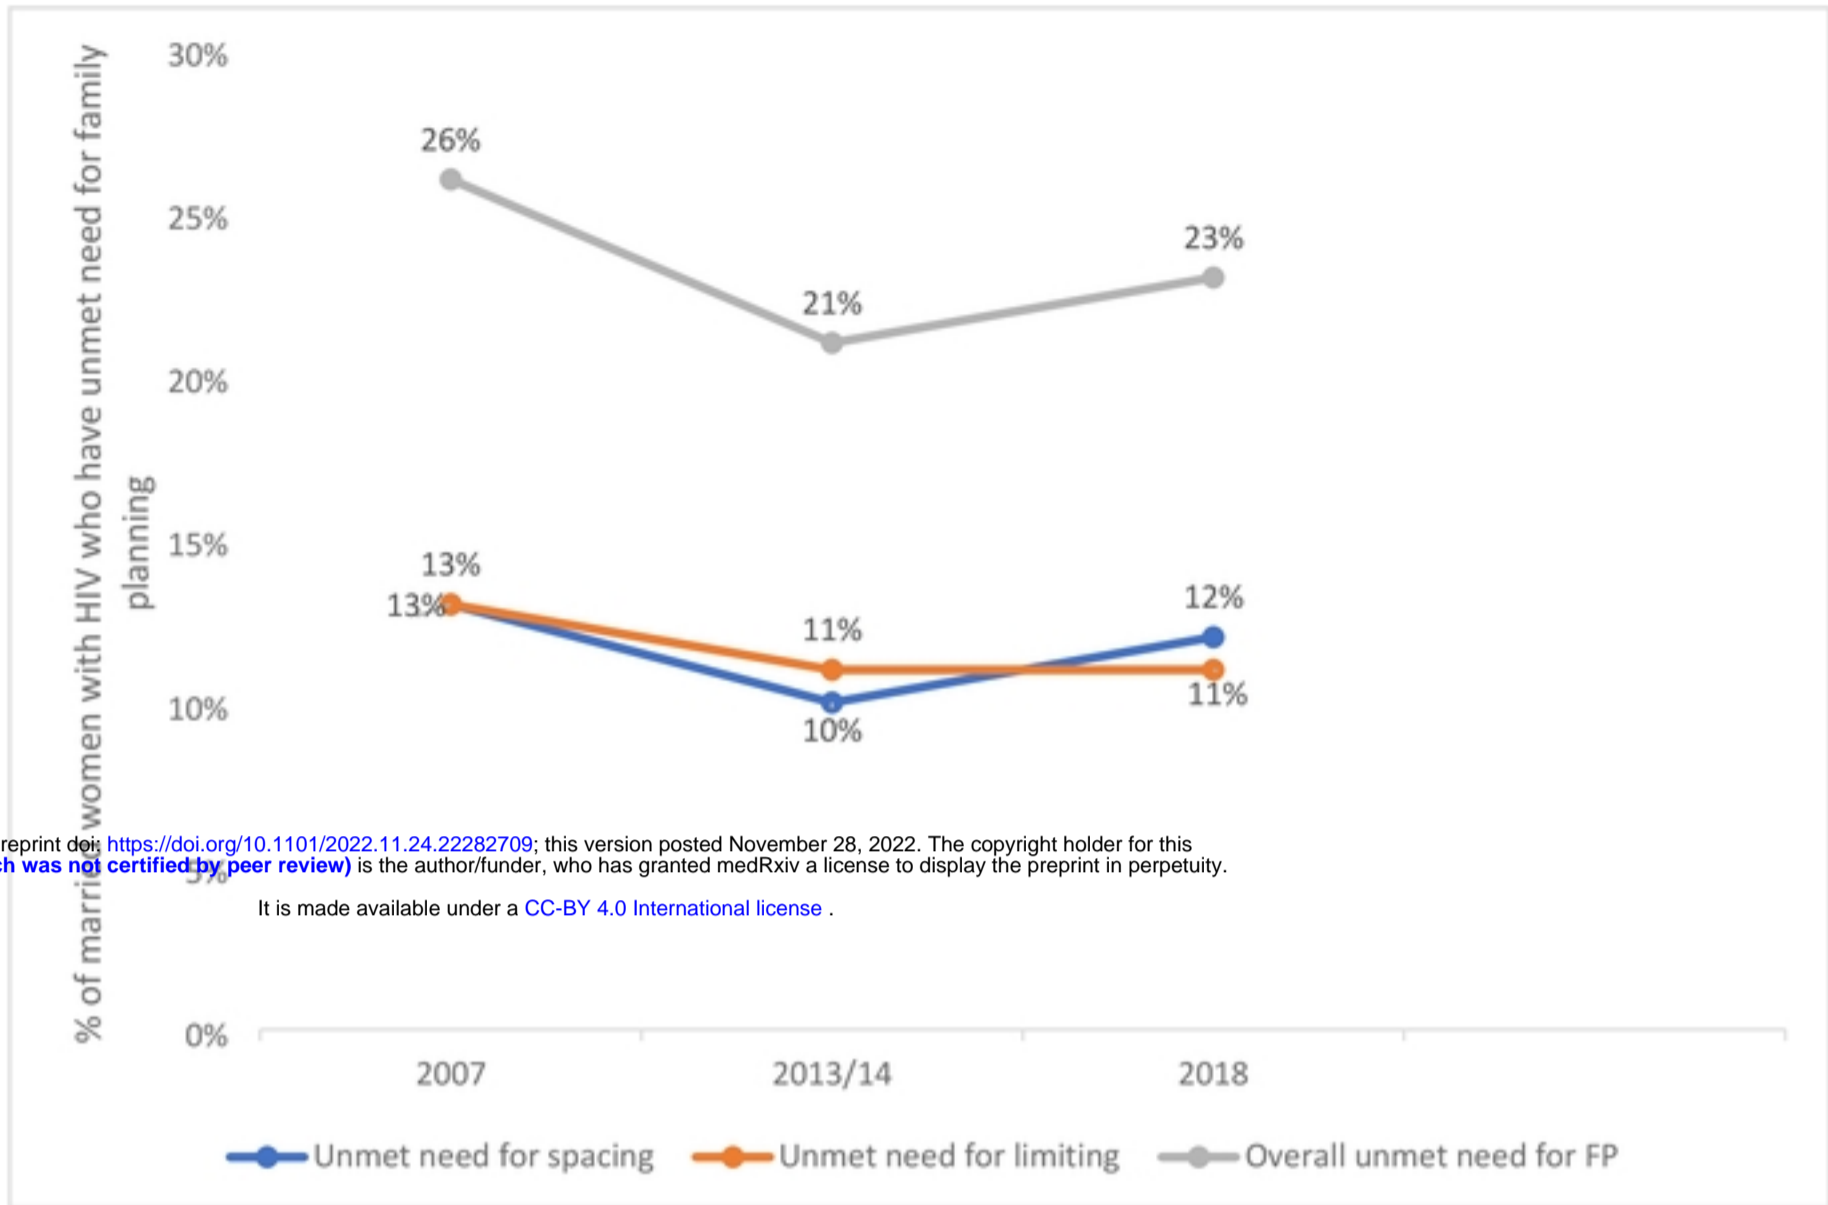

medRxiv preprint doi: <https://doi.org/10.1101/2022.11.24.22282709>; this version posted November 28, 2022. The copyright holder for this preprint (which was not certified by peer review) is the author/funder, who has granted medRxiv a license to display the preprint in perpetuity.

It is made available under a [CC-BY 4.0 International license](https://creativecommons.org/licenses/by/4.0/).
